# Supplementary material
Source: Research Square preprint supplement (doi:10.21203/rs.3.rs-9779953/v1)
Supplement: Supplementary file 1 [file 17a281acb7b53abe493d09d6.pdf]

# Animal Production Department

## Turnitin\_Effect of Dietary CM and OFSP Vine.docx

 PLAGIARISM

 SPS

 Federal University of Technology-Nigeria

---

### Document Details

Submission ID

trn:oid::1:3576460257

Submission Date

May 22, 2026, 1:47 PM GMT+1

Download Date

May 22, 2026, 1:51 PM GMT+1

File Name

Turnitin\_Effect\_of\_Dietary\_CM\_and\_OFSP\_Vine.docx

File Size

53.1 KB

9 Pages

4,120 Words

23,088 Characters

# 4% Overall Similarity

The combined total of all matches, including overlapping sources, for each database.

## Match Groups

-  **15 Not Cited or Quoted 4%**  
Matches with neither in-text citation nor quotation marks
-  **1 Missing Quotations 0%**  
Matches that are still very similar to source material
-  **0 Missing Citation 0%**  
Matches that have quotation marks, but no in-text citation
-  **0 Cited and Quoted 0%**  
Matches with in-text citation present, but no quotation marks

## Top Sources

- 4%  Internet sources
- 2%  Publications
- 1%  Submitted works (Student Papers)

### Match Groups

- 15 Not Cited or Quoted** 4%  
Matches with neither in-text citation nor quotation marks
- 1 Missing Quotations** 0%  
Matches that are still very similar to source material
- 0 Missing Citation** 0%  
Matches that have quotation marks, but no in-text citation
- 0 Cited and Quoted** 0%  
Matches with in-text citation present, but no quotation marks

### Top Sources

- 4% Internet sources
- 2% Publications
- 1% Submitted works (Student Papers)

### Top Sources

The sources with the highest number of matches within the submission. Overlapping sources will not be displayed.

|           |                |                                                                                    |     |
|-----------|----------------|------------------------------------------------------------------------------------|-----|
| <b>1</b>  | Internet       | <b>www.researchgate.net</b>                                                        | <1% |
| <b>2</b>  | Internet       | <b>www.mdpi.com</b>                                                                | <1% |
| <b>3</b>  | Student papers | <b>North West University</b>                                                       | <1% |
| <b>4</b>  | Internet       | <b>www.coursehero.com</b>                                                          | <1% |
| <b>5</b>  | Internet       | <b>pmc.ncbi.nlm.nih.gov</b>                                                        | <1% |
| <b>6</b>  | Publication    | <b>Yuxin Qin, Nenad Naumovski, Chaminda Senaka Ranadheera, Nathan M. D'Cunh...</b> | <1% |
| <b>7</b>  | Internet       | <b>journalijisr.com</b>                                                            | <1% |
| <b>8</b>  | Internet       | <b>www.biomedcentral.com</b>                                                       | <1% |
| <b>9</b>  | Internet       | <b>www.iiste.org</b>                                                               | <1% |
| <b>10</b> | Internet       | <b>www.research.manchester.ac.uk</b>                                               | <1% |

|                                                                                         |             |     |
|-----------------------------------------------------------------------------------------|-------------|-----|
| 11                                                                                      | Internet    |     |
| www.wjgnet.com                                                                          |             | <1% |
| <hr/>                                                                                   |             |     |
| 12                                                                                      | Internet    |     |
| www.educol.pl                                                                           |             | <1% |
| <hr/>                                                                                   |             |     |
| 13                                                                                      | Publication |     |
| John M. Levis, Murray J. Munro. "Pronunciation - Critical Concepts in Linguistics", ... |             | <1% |

1 **EFFECT OF DIETARY *CALOPOGONIUM MUCUNOIDES* AND ORANGE-FLESHED**  
2 **SWEET POTATO VINE ON RABBIT REPRODUCTIVE PERFORMANCE,**  
3 **HAEMATOLOGY, AND ANTIOXIDANT PROFILE**

4

**Article Info**

**Keywords:** Rabbit bucks; *Calopogonium mucunoides*; orange-fleshed sweet potato vine (OFSP); Semen quality; Oxidative stress; Humid tropical environment

**Abstract**

The study examined the effect of *Calopogonium mucunoides* and orange-fleshed sweet potato vine on the physiology, reproduction, and antioxidants of male rabbits. The experimental study utilized a completely randomized design with four treatment diets – control, *Calopogonium mucunoides* (CM), orange-fleshed sweet potato vines (PV), and PVCM. Data collection involved measurements of growth, libido, sperm characteristics, haematology, antioxidant enzymes, and hormones during experimental periods. Data obtained from the experiment was statistically analyzed using factorial analysis of variance (ANOVA) by using General Linear Model (GLM), with means being separated using Duncan Multiple Range Test, using the  $p < 0.05$  criterion. Results showed that the effects were complex and dynamic, where PV and PVCM improved libido, semen volume, and sperm motility and minimized abnormal sperms. Despite all these, antioxidant enzymes like GPX showed reduction with time, and there were elevated levels of cortisol alongside lowered testosterone hormone. This meant that oxidative and physiological stress were also felt even though there was a nutritional gain. The haematological parameters showed signs of adaptations, which is indicative of improved immune response of the body physiology to blood components. In conclusion, the study revealed that the experimental diets possessed some promising effects in improving reproductive traits as well as certain physiological responses, it was not completely positive in nature, as long-term intake seemed to cause minor metabolic and endocrine disturbances. It therefore recommends that the future diets should take into account other antioxidants in addition to including optimal amounts of the same along with stress handling measures for the environment.

5

6 **1. Introduction**

7 The search for sustainable rabbit production systems in the tropics has seen an increasing interest  
8 in non-conventional feed sources and their physiological impact. Indeed, rabbits, especially bucks,  
9 have shown to be quite sensitive to environmental factors and nutritional inputs, with direct  
10 physiological impacts on reproductive function, haematology, and oxidative status. For savannah  
11 climates which are humid, temperature and moisture changes create a problem for metabolic  
12 processes that affect libido, fertility, and hormonal system performance (Ajao & Ola, 2021;  
13 Okukpe et al., 2026). It is against this background that nutritional intervention emerges not just as  
14 additional input but also as one of the critical factors influencing physiological resilience. The  
15 plant-based feeds, such as *Calopogonium mucunoides* and orange-fleshed sweet potato (OFSP)

16 vines, contain important bioactive elements, vitamins, and antioxidants, that might be useful in  
17 improving the reproductive and health status. Several studies have shown that plant-based feeds  
18 enhance the efficiency of sperm quality, haematology, and antioxidant systems in bucks (Ajuogu  
19 et al., 2018; Ajao & Ola, 2022; Babaniyi, 2023; Ajao et al., 2025). However, it appears that very  
20 little is known about the physiological effects that occur when these two feeds are taken  
21 concurrently by bucks.

22 However, rabbits raised in Nigeria and agro-ecosystems characterized by such humid, temperature  
23 and moisture changes continue suffering from low reproduction performance, poor semen quality,  
24 and physiological disorders resulting from inadequate nutrition and oxidative stress. Traditional  
25 sources of rabbit feed have become too costly and even lacking in nutritive values. There is,  
26 therefore, an urgent need for more affordable and effective sources of feeds to be explored.  
27 Although studies have been done regarding the individual influence of the use of OFSP vine or  
28 other plant supplements, limited research is available on the integration of *Calopogonium*  
29 *mucunoides* with OFSP vine to improve reproductive, hematological, and antioxidative status of  
30 rabbits. Oxidative stress, which has been found to adversely affect sperm cell vitality and  
31 physiology, is seldom considered comprehensively in studies about the efficacy of feeding rabbits  
32 (Ajao et al., 2022; Liang et al., 2022).

33 When it comes to production, finding sources of feeds that can help improve reproduction  
34 performance may be very important for improving the success of rearing rabbits. Both OFSP vine  
35 and *Calopogonium mucunoides* are leguminous forages, where the latter contains high protein  
36 content and the former helps provide vitamins, including beta-carotene that has been associated  
37 with antioxidant benefits. Using both of them simultaneously may allow creating some synergy  
38 effect for preventing oxidative stress as well as enhancing reproduction performance. There is  
39 some evidence indicating the positive role of both feeds in relation to growth and physiological  
40 parameters (Ajao et al., 2022; Babaniyi, 2023; Ajao et al., 2025), but much less information is  
41 available in other contexts. Against this backdrop, the main aim of the current study is to conduct  
42 an assessment of the effect of incorporating *C. mucunoides* and OFSP vine in the diet of rabbits on  
43 their reproductive efficiency, haematological parameters, and antioxidant status.

44 From a scientific perspective, this study is relevant because of its contribution to existing literature  
45 on functional feeds and nutraceuticals in livestock production. It makes connections between  
46 several fields from nutrition to reproduction and oxidative physiology as well provides information  
47 that might prove useful for feed development and management. In addition, the focus on oxidative  
48 balance along with conventional measures of animal performance reflects new trends in the field,  
49 where emphasis is placed on animal health as the key prerequisite to productivity.

## 50 2.0 Materials and Methods

### 51 2.1 Study and Ethics

52 The experiment was conducted in accordance with ethical approval from the Ethical Review  
53 Committee, UERC/ASN/2024/2715, of the University of Ilorin, Ilorin, Nigeria. This study was  
54 carried out for eight weeks on rabbits farm located at Ganmo, Kwara State, Ifelodun Local  
55 Government Area, on latitude 8.41900N and longitude 4.60360E.

56 **Clinical trial number:** not applicable.

### 57 2.2 Experimental design

58 A total of twenty-four adult rabbits bucks (with body weights averaging 1.25 kg) aged between 6  
59 and 8 months were used in this experiment. They were individually kept in wooden cages  
60 measuring 35 cm x 42 cm x 54 cm, and which had wire-mesh floors and corrugated iron roofs.  
61 Four diets were prepared. These were made up of the concentrate feeds, which were whole, in  
62 equal amounts of 150 g per animal, together with four forage treatments that comprised of the  
63 control diet (with only concentrate feeds) and the following forages: *Calopogonium mucunoides*  
64 (CM), orange-fleshed sweet potato vines (PV), and combination of *Calopogonium mucunoides*  
65 (CM), and orange-fleshed sweet potato vines (PV) (PVC). In preparing the latter diet, 10 kg each  
66 of the CM and PV forages were thoroughly mixed. The twenty-four animals used were randomly  
67 divided among the four diets, depending on their body weights, into six in each group. These  
68 animals were fed feed and water *ad libitum* for the entire duration of the experiment. Also, twenty  
69 kilograms of concentrates were supplied to each group.

### 70 2.3 Evaluation of weight and Libido

71 The body weight of the rabbits was measured weekly using a digital weighing balance. To assess  
72 libido, a teaser doe was introduced to three bucks within each experimental treatment group for a  
73 period of 3 minutes. The time taken by each buck to initiate the first mount on the doe was recorded  
74 as the reaction time, which served as an indicator of libido. This procedure was conducted at  
75 weekly intervals throughout the duration of the study.

### 76 2.4 Collection of Semen and Analysis

77 Semen samples were collected on weekly basis for eight weeks using a modified artificial vagina  
78 that was kept at 45 °C. Three bucks per treatment were used during the semen collection process,  
79 which was carried out in conjunction with teaser does following the method proposed by Ajao and  
80 Ola (2022). The sampling was done within the period of 08:00 am and 10:00 am. While obtaining  
81 semen, as the buck mounted and attempted to thrust on the teaser does before intromission, the  
82 artificial vagina was carefully fitted from behind to stimulate ejaculation. The collected semen was  
83 analyzed right away as per the IRRG (2005) criteria. The volume of semen collected was  
84 determined using the calibration of the collection tube. Motility evaluation was done using a drop  
85 of semen without dilution and placed on a warmed glass slide of 37°C and viewed under a light  
86 microscope at a magnification of ×400. Viability test of sperm was done through eosin–nigrosin  
87 staining. Semen sample was taken, mixed with eosin-nigrosin dye, smeared on a glass slide and  
88 viewed under a microscope (x400 magnification). Living sperm showed no stain, whereas  
89 nonviable sperm-stained pink in color. Morphological analysis of the semen was done by preparing  
90 a smear of the eosin–nigrosin-stained semen on a glass slide covered with a coverslip inclined at  
91 45°. This smear was air dried at room temperature for 10-15 minutes, after which it was examined  
92 under a microscope at x1000 magnification for identification of morphological defects. The  
93 concentration of sperm cells was measured by improved Neubauer hemocytometer. Ten microliters  
94 of semen sample was diluted at 1:100 in normal saline solution. Two drops of formalin solution  
95 were added to preserve and fix the sperm cells. The prepared suspension was introduced to the  
96 counting chamber, and the sperm cell count was done subsequently. The total number of sperm  
97 counted was referred to as N. sperm count (SC) and sperm concentration (SCN) was obtained by  
98 the following equation:

$$99 \quad SC = N \times 10000 \times \text{dilution factor/ml of semen}$$

100 (where: SC = total number of counted sperm cells)

## 101 2.5 Determination of Haematology, Hormone and Enzymes

102 2 mL of blood sample was collected from the ear veins of the bucks during week one (beginning  
103 of the experiment) and at week eight (end of the experiment). Blood samples to be used for  
104 hematological analyses were collected in test tubes containing EDTA and analyzed based on the  
105 procedures described by Ewuola et al. (2012) and Jain (1986). In addition, some blood samples  
106 were taken in plain test tubes for the purpose of serum extraction and the determination of hormone  
107 and antioxidant levels. Peripheral levels of testosterone, cortisol, as well as catalase, superoxide  
108 dismutase, and glutathione peroxidase enzymes levels were measured based on the methods  
109 specified by Jimoh (2019) and Ewuola et al. (2012).

## 110 2.6 Statistical Analysis

111 The data collected from the experiment were analyzed by factorial analysis of variance (ANOVA)  
112 using General Linear Model (GLM) for completely randomized designs (CRD). The means of the  
113 treatments were compared and separated using Duncan's Multiple Range Test with significance  
114 determined and concluded at the level of  $p < 0.05$ . The statistical analyses of the data were done  
115 using the IBM Statistical Package for the Social Sciences (SPSS), version 21.0. The experimental  
116 model described below was used to analyze the animal's response in the experiment:

$$117 Y_{ijklm} = \mu + A_i + B_j + C_k + B_n C_{jk} + E_{ijkl}$$

118  $Y_{ijklm}$  = response variables;  $\mu$  = population mean;  $A_i$  = effect of formulated concentrate;  $B_j$  = effect  
119 of orange - fleshed sweet potato vine (PV);  $C_k$  = effect of *C. mucunoides* (CM);  $B_n C_{jk}$  = combined  
120 effect of PV and CM;  $E_{ijkl}$  = residual error

## 121 3.0 Results

### 122 Weekly Body Weight and Libido of Experimental Rabbit Bucks

123 Body weight had a relatively stable and increasing trend throughout the weeks, indicating that  
124 sufficient support for weight maintenance and slow growth was provided, and that this was  
125 consistent with observations of Ajao et al. (2022) and Okukpe et al., (2026) that proper nutrition  
126 maintains physiological stability in rabbits. On the other hand, libido (LIBD) had significant  
127 variations, peaking sharply in week 2 and week 4 before declining, indicating that libido can be  
128 highly influenced by temporary physiological or environmental factors and not weight alone (Ajao  
129 & Ola, 2021). This decrease in libido during the latter part of the experiment might suggest an  
130 increasing level of oxidative or thermal stress, both of which have been found to negatively affect  
131 reproductive behavior and hormonal homeostasis in bucks (Liang et al., 2022). Overall, this poor  
132 correlation between weight and libido supports the hypothesis that male reproduction behavior  
133 depends more on physiological factors than growth, similar to previous studies on the relationship  
134 between nutritional components and semen quality/sex-drive (Ajao & Ola, 2022).

135

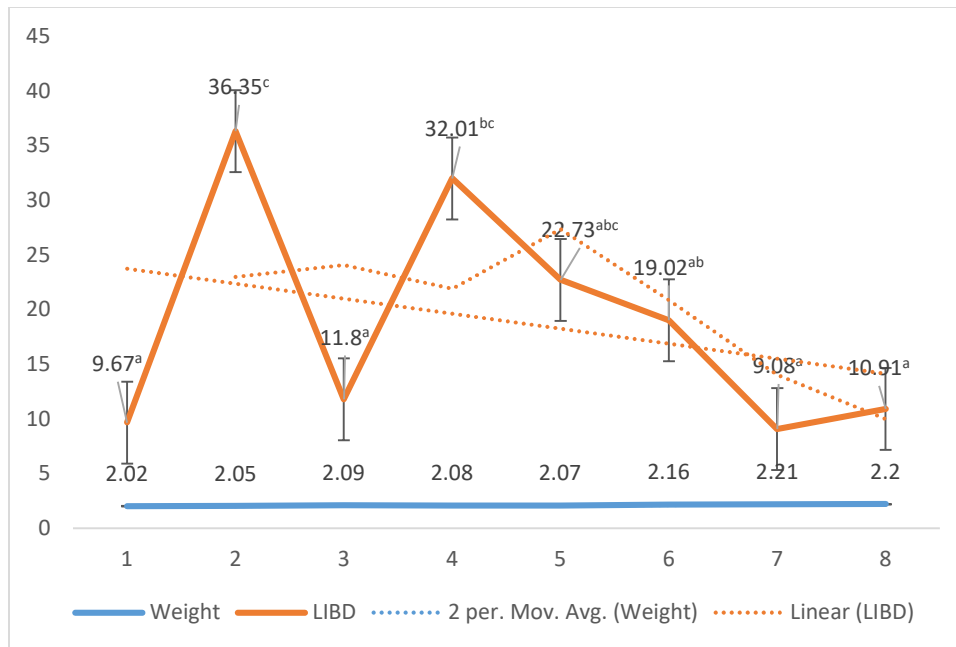

136

137 *Figure 1: Weekly Body Weight and Libido of Experimental Rabbit Bucks*

138 Figure 1 shown that there was a relatively steady body weight, with an upward trend throughout  
 139 the weeks, indicating that sufficient nourishment and support were provided for maintaining and  
 140 gradually growing body weight, which correlates with the fact that balanced nutrition promotes  
 141 physiological stability in rabbits (Ajao et al., 2022). In contrast, the libido exhibited clear  
 142 variations, having two peaks, which occurred at week 2 and week 4, with a subsequent fall, which  
 143 could mean that the sexual drive can be highly affected by some factors other than body weight  
 144 because the sexual drive is sensitive to changing conditions (Ajao & Ola, 2021). It might suggest  
 145 that there was increasing oxidative or thermogenic stress during the study, both of which negatively  
 146 impact reproductive behavior in males (Liang et al., 2022). Also, poor correlation between weight  
 147 and libido indicates that reproduction is mainly influenced by physiological conditions and the  
 148 presence of antioxidants in the body, confirming claims that semen quality and libido depend more  
 149 on diet than on weight change (Ajao & Ola, 2022).

150 **Table 1: Dietary Influence of *Calopogonium mucunoides* and OFSP Vine on Weight and**  
 151 **Libido of Rabbit Bucks**

| Week       | Weight            | LIBD               |
|------------|-------------------|--------------------|
| C          | 2.18 <sup>b</sup> | 13.48 <sup>a</sup> |
| CM         | 1.96 <sup>a</sup> | 17.45 <sup>a</sup> |
| PV         | 2.17 <sup>b</sup> | 15.02 <sup>a</sup> |
| PVCM       | 2.14 <sup>b</sup> | 29.83 <sup>b</sup> |
| p-value    | 0.02              | 0.02               |
| SEM±       | 0.04              | 3.32               |
| Grand Mean | 2.11±0.02         | 18.95±1.66         |

152 *SME = standard error mean; LIBD = Libido; C = Control; CM = Calopogonium Mucunoides; PV = Orange-*  
 153 *fleshed potato vine*

154 The Table 1 revealed that CM significantly lowered the body weight compared to control and other  
 155 treated groups ( $p < 0.05$ ), implying either restrictions in utilization of nutrients or anti-nutritive  
 156 effects that could lower growth rate, similar to the growth rate variability in response to forage-  
 157 based supplementation as reported by Olaleru (2021) and Ajao et al. (2022). On the other hand,  
 158 the PVCMM mixture had a high libido score, meaning the combination enhanced the expression of  
 159 reproductive traits, which is similar to the report of El-Desoky et al. (2017), and Ajao and Ola  
 160 (2022), showing that dietary supplements can enhance reproductive behavior and semen quality  
 161 through modulation of endocrine and antioxidant systems (Ajao & Ola, 2022; El-Desoky et al.,  
 162 2017). In general, the statistical significance of results ( $p = 0.02$ ) implies that the diets had distinct  
 163 impacts on the measured growth and reproductive characteristics. This is because the physiological  
 164 balance between the growth and reproduction in rabbits is usually linked to their oxidative and  
 165 nutritional state (Liang et al., 2022; Okukpe et al., 2026)

166 **Table 2: Seminal Characteristics of the experimental Rabbit Bucks**

| Week      | SV                  | pH   | PGM                 | MOT                | TMC                  | SC                   | ABN                 |
|-----------|---------------------|------|---------------------|--------------------|----------------------|----------------------|---------------------|
| 1         | 0.76 <sup>abc</sup> | 7.58 | 69.50 <sup>c</sup>  | 0.72 <sup>b</sup>  | 93.16 <sup>a</sup>   | 166.67 <sup>a</sup>  | 9.58 <sup>a</sup>   |
| 2         | 0.75 <sup>abc</sup> | 7.83 | 67.92 <sup>bc</sup> | 0.78 <sup>ab</sup> | 117.53 <sup>a</sup>  | 187.42 <sup>a</sup>  | 15.16 <sup>ab</sup> |
| 3         | 0.68 <sup>ab</sup>  | 7.83 | 51.67 <sup>a</sup>  | 0.60 <sup>a</sup>  | 230.93 <sup>ab</sup> | 390.67 <sup>b</sup>  | 9.50 <sup>a</sup>   |
| 4         | 0.63 <sup>a</sup>   | 7.75 | 61.67 <sup>bc</sup> | 0.73 <sup>b</sup>  | 121.93 <sup>a</sup>  | 299.25 <sup>ab</sup> | 22.13 <sup>bc</sup> |
| 5         | 0.65 <sup>ab</sup>  | 8.00 | 70.50 <sup>c</sup>  | 0.84 <sup>c</sup>  | 200.42 <sup>ab</sup> | 416.58 <sup>b</sup>  | 22.29 <sup>bc</sup> |
| 6         | 1.03 <sup>cd</sup>  | 7.83 | 59.17 <sup>ab</sup> | 0.71 <sup>b</sup>  | 418.72 <sup>c</sup>  | 593.75 <sup>c</sup>  | 17.13 <sup>b</sup>  |
| 7         | 0.94 <sup>bcd</sup> | 7.75 | 65.42 <sup>bc</sup> | 0.75 <sup>b</sup>  | 82.24 <sup>a</sup>   | 124.08 <sup>a</sup>  | 27.29 <sup>c</sup>  |
| 8         | 1.08 <sup>d</sup>   | 7.42 | 61.25 <sup>bc</sup> | 0.70 <sup>b</sup>  | 299.94 <sup>bc</sup> | 388.33 <sup>b</sup>  | 72.71 <sup>d</sup>  |
| p-value   | 0.02                | 0.06 | 0.02                | 0.02               | 0.02                 | 0.02                 | 0.02                |
| SEM $\pm$ | 0.10                | 0.13 | 3.07                | 0.03               | 53.91                | 60.55                | 2.43                |

167 *SME = standard error mean; SV = Seminal volume; PGM = Progressive motility; TMC = Total motility count; SC =*  
 168 *Sperm concentration; ABN = Abnormal Sperm Cells*

169 Table 2 shown that seminal volume (SV) showed a statistically significant trends towards higher  
 170 levels in later weeks with the highest level at week 8 ( $p < 0.05$ ). This implies that the accessory  
 171 glands were functioning more efficiently and producing more semen, respectively, as observed by  
 172 IRRG (2005), Ajao and Ola (2021), and Ajao et al. (2025) in rabbits. Likewise, there were  
 173 considerable variations in PGM, MOT, TMC, and SC values ( $p < 0.05$ ) as high values were noted  
 174 in weeks 5 and 6 indicating increased spermatogenesis and viability of spermatozoa. This is similar  
 175 to the report of El-Desoky et al. (2017), and Ajao and Ola (2022) which revealed that the impact  
 176 of nutrition and environment on semen quality may be modulated by oxidative stress defense  
 177 system and hormonal action. Semen pH was rather steady ( $p > 0.05$ ), although small deviations in  
 178 pH levels observed indicate the maintenance of an optimal pH environment for sperm survival, in  
 179 line with the report of Jain (1986), reporting the stability of rabbit semen pH to short-term  
 180 physiological variations. The rapid increase in ABN, especially by week 8, is indicative of  
 181 emerging reproductive stress or potential oxidative damage, thus illustrating a possible trade-off  
 182 between the quantity of produced spermatozoa and their viability due to the influence of long-term  
 183 physiological or environmental stressors (Jimoh, 2019; Liang et al., 2022).

184 **Table 3: Seminal Characteristics of the Experimental Rabbit Bucks fed *Calopogonium***  
 185 ***mucunoides* and OFSP Vine**

| Week | SV | pH | PGM | MOT | TMC | SC | ABN |
|------|----|----|-----|-----|-----|----|-----|
|------|----|----|-----|-----|-----|----|-----|

|            |                   |                   |                    |                   |                      |              |                    |
|------------|-------------------|-------------------|--------------------|-------------------|----------------------|--------------|--------------------|
| C          | 0.63 <sup>a</sup> | 7.58 <sup>a</sup> | 55.79 <sup>a</sup> | 0.66 <sup>a</sup> | 157.53 <sup>a</sup>  | 361.42       | 26.83 <sup>b</sup> |
| CM         | 0.68 <sup>a</sup> | 7.63 <sup>a</sup> | 64.67 <sup>b</sup> | 0.72 <sup>b</sup> | 142.71 <sup>a</sup>  | 289.13       | 25.71 <sup>b</sup> |
| PV         | 1.06 <sup>b</sup> | 7.88 <sup>b</sup> | 68.13 <sup>b</sup> | 0.77 <sup>b</sup> | 286.54 <sup>ab</sup> | 339.88       | 19.63 <sup>a</sup> |
| PVCM       | 0.90 <sup>b</sup> | 7.92 <sup>b</sup> | 64.96 <sup>b</sup> | 0.75 <sup>b</sup> | 195.45 <sup>b</sup>  | 292.96       | 25.73 <sup>b</sup> |
| p-value    | 0.02              | 0.01              | 0.02               | 0.02              | 0.04                 | 0.56         | 0.02               |
| SEM±       | 0.07              | 0.09              | 2.17               | 0.02              | 38.12                | 42.81        | 1.72               |
| Grand Mean | 0.82±0.03         | 7.75±0.04         | 63.39±1.09         | 0.73±0.01         | 195.61±19.06         | 320.84±21.41 | 24.47±0.86         |

186 SME = standard error mean; SV = Seminal volume; PGM = Progressive motility; TMC = Total motility count; SC =  
 187 Sperm concentration; ABN = Abnormal sperm cells; C = Control; CM = Calopogonium Mucunoides; PV = Orange-  
 188 fleshed potato vine

189 Table 3 further revealed that SV and semen pH levels were significantly increased among the  
 190 groups fed with PV and PVCM (p<0.05), indicating better performance of the accessory glands,  
 191 as well as better semen quality. The trends are consistent with the findings of IRRG (2005) and  
 192 Ajao and Ola (2022) that plant-based dietary supplementations increase fluid dynamics in rabbits.  
 193 PGM and MOT were both significantly elevated in the experimental diet groups compared to  
 194 controls (p<0.05), suggesting a significant role played by both *Calopogonium mucunoides* and  
 195 orange-fleshed sweet potatoes' vines to boost sperm motility, most likely due to their ability to  
 196 protect cells from oxidative stress as described by El-Desoky et al. (2017) and Liang et al. (2022).  
 197 Highest Total Motile Count (TMC) was observed in the groups fed PV and PVCM, but statistically  
 198 not significant (P<0.05), showing improved sperm production efficacy and motility, whereas the  
 199 Sperm Concentration (SC) was similar among all treatments (P>0.05), implying that the nutritional  
 200 diet impacted sperm quality rather than quantity, similar to what has been established by Ajuogu  
 201 et al. (2018) for rabbit reproductive physiology. It is also important to state that the lowest number  
 202 of abnormal sperm cells (ABN) was detected in the PV treatment group (P<0.05), showing its  
 203 superiority in preserving the structure of sperm cells, attributed to its potent antioxidative content.

204 **Table 4: Haematological Characteristics of the Experimental Rabbit Bucks fed**  
 205 ***Calopogonium mucunoides* and OFSP Vine**

| Parameters | Period  | Ctrl                | CM                   | PV                  | PVCM                | p-Value | SEM± | Grand Mean |
|------------|---------|---------------------|----------------------|---------------------|---------------------|---------|------|------------|
| WBC        | Initial | 7.23                | 7.43                 | 9.60                | 8.97                | 0.66    | 6.27 | 8.53±1.81  |
|            | End     | 3.00                | 4.10                 | 30.27               | 5.27                |         |      |            |
| RBC        | Initial | 5.20 <sup>B</sup>   | 5.64 <sup>B</sup>    | 5.13 <sup>B</sup>   | 5.53 <sup>B</sup>   | 0.01    | 0.43 | 4.81±0.13  |
|            | End     | 3.97 <sup>A</sup>   | 4.27 <sup>A</sup>    | 3.70 <sup>A</sup>   | 4.43 <sup>A</sup>   |         |      |            |
| HGB        | Initial | 9.00 <sup>aB</sup>  | 8.90 <sup>abB</sup>  | 8.60 <sup>abB</sup> | 9.13 <sup>bB</sup>  | 0.02    | 0.80 | 8.05±0.23  |
|            | End     | 5.03 <sup>aA</sup>  | 6.13 <sup>abA</sup>  | 7.70 <sup>abA</sup> | 8.90 <sup>bA</sup>  |         |      |            |
| HCT        | Initial | 39.50 <sup>aB</sup> | 40.40 <sup>bB</sup>  | 39.07 <sup>aB</sup> | 41.20 <sup>aB</sup> | 0.00    | 2.35 | 29.68±0.68 |
|            | End     | 17.40 <sup>aA</sup> | 29.30 <sup>bA</sup>  | 23.00 <sup>aA</sup> | 26.67 <sup>aA</sup> |         |      |            |
| MCV        | Initial | 76.07 <sup>B</sup>  | 71.80 <sup>B</sup>   | 76.30 <sup>B</sup>  | 74.63 <sup>B</sup>  | 0.00    | 3.43 | 66.43±0.99 |
|            | End     | 60.10 <sup>A</sup>  | 60.07 <sup>A</sup>   | 62.13 <sup>A</sup>  | 59.97 <sup>A</sup>  |         |      |            |
| MCH        | Initial | 17.33 <sup>bA</sup> | 15.87 <sup>aA</sup>  | 16.80 <sup>bA</sup> | 16.53 <sup>bA</sup> | 0.00    | 0.55 | 18.40±0.16 |
|            | End     | 18.12 <sup>bB</sup> | 14.24 <sup>aB</sup>  | 20.80 <sup>bB</sup> | 20.03 <sup>bB</sup> |         |      |            |
| MCHC       | Initial | 22.80 <sup>A</sup>  | 22.07 <sup>A</sup>   | 21.97 <sup>A</sup>  | 22.17 <sup>A</sup>  | 0.00    | 1.35 | 28.28±0.39 |
|            | End     | 28.97 <sup>B</sup>  | 21.05 <sup>B</sup>   | 33.48 <sup>B</sup>  | 33.38 <sup>B</sup>  |         |      |            |
| LYM        | Initial | 59.83 <sup>aA</sup> | 52.00 <sup>bA</sup>  | 43.20 <sup>aA</sup> | 48.27 <sup>cA</sup> | 0.00    | 7.26 | 76.08±2.10 |
|            | End     | 51.00 <sup>aB</sup> | 101.00 <sup>bB</sup> | 55.00 <sup>aB</sup> | 69.00 <sup>cB</sup> |         |      |            |

206 *abAB Means with different superscript within the columns and across the rows are significantly different (P < 0.05),*  
 207 *SEM = Standard error mea; WBC = White Blood Cell, RBC = Red Blood Cell, HCT = Haematocrit (PCV = Packed*  
 208 *Cell Volume), HGB = Haemoglobin, MCV = Mean Corpuscular Volume; MCH = Corpuscular Haemoglobin;*  
 209 *MCHC = Corpuscular Haemoglobin Concentration; C = Control; CM = Calopogonium Mucunoides; PV = Orange-*  
 210 *fleshed potato vine*

211 The Table 4 revealed non-significant differences in WBC ( $p > 0.05$ ) among treatment groups despite  
 212 the obvious increase in PV at the end of the experiment, imply an enhancing but inconsistent  
 213 immune reaction, suggesting that orange-fleshed sweet potato vine might promote leukocyte  
 214 proliferation under specific physiological conditions, similar to immune regulation due to nutrition  
 215 in rabbits (Ewuola et al., 2012; Liang et al., 2022). There was a significant decrease in RBC, HGB,  
 216 and HCT levels between initial and end ( $p < 0.05$ ), but the higher level of HGB in PVCMM at the end  
 217 indicates enhanced oxygen transport capabilities under dietary treatment conditions, consistent  
 218 with findings of Ajao and Ola (2021) and Okukpe et al. (2026) that phytogetic feed diets help  
 219 mitigate stress-related haematological suppression. The significant decline in MCV accompanied  
 220 by rises in MCH and MCHC towards the end ( $p < 0.05$ ) is indicative of a trend toward higher  
 221 hemoglobin concentration within erythrocytes, implying erythropoietic adaptations likely  
 222 prompted by diet-induced nutrient quality and antioxidant effects in the blood, consistent with the  
 223 documented responses to the consumption of plant-based dietary supplements in rabbits as  
 224 established by Jain (1986) and El-Desoky et al. (2017). The lymphocyte (LYM) level showed a  
 225 significant increase especially among the CM group at the end stage ( $p < 0.05$ ), suggesting an  
 226 increased immune response, probably owing to disease resistance and immuno-competency due  
 227 to the use of leguminous forage in addition, consistent with the studies of Ewuola et al. (2012) and  
 228 Ajuogu et al. (2018) that found plants as sources of feed ingredients capable of stimulating rabbit  
 229 immunity.

230 **Table 5: Oxidative Stress and Hormonal Responses of Rabbit Bucks Fed *Calopogonium***  
 231 ***mucunoides* and Orange-Fleshed Sweet Potato Vine**

| Parameters   | Period  | Ctrl                 | CM                  | PV                  | PVCM                 | p-Value | SEM±  | Grand Mean   |
|--------------|---------|----------------------|---------------------|---------------------|----------------------|---------|-------|--------------|
| GPX          | Initial | 263.70 <sup>B</sup>  | 173.68 <sup>B</sup> | 256.95 <sup>B</sup> | 227.69 <sup>B</sup>  | 0.00    | 40.47 | 146.68±11.68 |
|              | End     | 170.91 <sup>A</sup>  | 156.49 <sup>A</sup> | 173.56 <sup>A</sup> | 169.47 <sup>A</sup>  |         |       |              |
| Catalase     | Initial | 10.10                | 8.53                | 16.55               | 4.97                 | 0.92    | 3.90  | 10.36±1.13   |
|              | End     | 16.22                | 8.60                | 8.35                | 10.83                |         |       |              |
| SOD          | Initial | 0.87                 | 0.21                | 0.84                | 1.16                 | 0.28    | 0.26  | 0.66±0.07    |
|              | End     | 0.84                 | 1.16                | 0.30                | 0.61                 |         |       |              |
| Testosterone | Initial | 7.07 <sup>B</sup>    | 8.95 <sup>B</sup>   | 7.51 <sup>B</sup>   | 1.53 <sup>B</sup>    | 0.01    | 1.65  | 3.98±0.48    |
|              | End     | 1.00 <sup>A</sup>    | 1.45 <sup>A</sup>   | 1.47 <sup>A</sup>   | 0.65 <sup>A</sup>    |         |       |              |
| Cortisol     | Initial | 4.95 <sup>abA</sup>  | 5.69 <sup>aA</sup>  | 5.66 <sup>ba</sup>  | 5.70 <sup>abA</sup>  | 0.00    | 2.05  | 23.03±0.59   |
|              | End     | 14.15 <sup>abB</sup> | 11.70 <sup>aB</sup> | 15.51 <sup>bb</sup> | 11.71 <sup>abB</sup> |         |       |              |

232 *abAB Means with different superscript within the columns and across the rows are significantly different (P < 0.05),*  
 233 *SEM = Standard error mean; C = Control; CM = Calopogonium Mucunoides; PV = Orange-fleshed potato vine*

Table 5 revealed that the decrease in the level of glutathione peroxidase (GPX) from initial to end ( $p < 0.05$ ) might be attributed to antioxidant capability exhaustion due to the constant presence of physiological and/or environmental stressors, which could imply that the antioxidant systems were increasingly being exhausted despite dietary treatment, a trend that was common among rabbits exposed to the tropics (Jimoh, 2019; Liang et al., 2022). The levels of Catalase and superoxide dismutase (SOD) did not exhibit any remarkable difference ( $p > 0.05$ ). However, the numerical

variation in their levels reveals some alterations in their enzymes' activities. Thus, it can be concluded that Catalase and SOD enzymes are quite stable and require prolonged exposure or dietary intake to elicit a response. A significant decrease in testosterone was observed for all treatments at the end of the experiment ( $p < 0.05$ ), an indication of low reproductive hormonal activity, possibly due to stress and/or metabolic stressors, which corroborates the claim of Ajao and Ola (2021), and Liang et al. (2022) that stress and oxidation reduce endocrine activity and sex drive in rabbit bucks. Also, cortisol levels showed a significant increase in all treatments ( $p < 0.05$ ), especially in the group fed PV treatment, an indication of **increased stress** and **stimulation of the hypothalamus-pituitary-adrenal (HPA) axis**, hence proving the inverse relationship between stress hormone levels and reproductive efficacy during stress conditions (Ajao & Ola, 2021; Jimoh, 2019).

#### **4.0 Conclusion and Recommendation**

**4.1 Conclusion** The results obtained, it is evident that there was a mixed effect of nutrition, physiology, and environment on male rabbits' performance. It is clear that the inclusion of *Calopogonium mucunoides* and orange-fleshed sweet potato vine in the diet brought about positive changes in libido, semen characteristics, and some hematological parameters. On the other hand, the reduction in the activity of antioxidant enzymes and testosterone hormone levels pointed to hidden physiological problems brought about by the inclusion of the plants in the rabbit's diet. Although, there are potential benefits associated with incorporating the experimental diets in a rabbit's diet, these benefits are not straightforward and are influenced by metabolic challenges. The increase in cortisol hormone, sperm abnormalities, and erythrocyte levels indicates that the rabbit bucks are trying to adapt to the changes occurring in their body. However, the process requires energy, and as such, the organisms will have to adapt to the tropics' challenging conditions.

#### **4.2 Recommendation**

Future diets for rabbits should include not only the tested diets but also better sources of antioxidants in order to minimize oxidative stress and stabilize hormones. The quantities needs to be regulated since too much can make the advantages turn disadvantages in terms of inducing physiological stress. Moreover, providing proper temperature regulation and performing extended studies in order to examine molecular mechanisms and hormonal processes will ensure the formulation of better diets for rabbits.
